# Supplementary material for: A Method for the Interpretation of Flow Cytometry Data Using Genetic Algorithms
Source: PubMed Central journal article supplement — J Pathol Inform. 2018 Apr 20;9:16. doi: 10.4103/jpi.jpi_76_17 (PMC5937296; doi:10.4103/jpi.jpi_76_17), 2018-04-20
Supplement: JPI-9-16_Suppl1.pdf [file JPI-9-16_Suppl1.pdf]

## SUPPLEMENTARY TEXT

**Supplementary Text 1:** Mathematical operators used by algorithms 018330 and 025886 (Interactive Data Language code)

MEAN

PRO ga\_mean, in, out, w, s

```
kernel = gs_mselt(w,s)
```

```
out = gs_convolve(in,kernel,/ave)
```

END

IFLTE

PRO ga\_iflte, in1, in2, in3, in4, out

```
;+
```

```
; GA Project: If less than else
```

```
;
```

```
;-
```

```
w1 = in1 lt in2
```

```
w2 = in1 ge in2
```

```
out = w1 * in3 + w2 * in4
```

END

ADDP

PRO ga\_addp, in1, in2, out

```
;+
```

```
; Add two data planes
```

```
;-
```

```
out = in1 + in2
```

END

QTREG

PRO ga\_qtreg,inplane,outplane,slopes,offsets,threshin

```
;+
```

```
;GA Project: Returns the region size (in log base 2) around each pixel for which the normalized variance per pixel standard of the square region first reaches a given threshold. Also returns planes with the linear fit slope and offset of the variance as a function of region scale for each pixel
```

```
;
```

```
Calling Sequence: ga_qtreg,inplane,outplane,slopes,offsets,thresh
```

```
;
```

Parameters:

```
;inplane = Input plane
```

```
;outplane = Output plane with log base 2 region sizes
```

```
;slopes = Output slopes of fits for variance/pixel vs. log region size
```

```
;offsets = Output offsets of fits for variance/pixel vs. log region size
```

```
;thresh = Input fractional threshold for the variance (between 0 and 1).
```

```
;If thresh is greater than 1, then the module of the value\ is used. If thresh is negative, the absolute value is used.
```

```
-thresh=abs(threshin) mod 1.0
```

```
maxi=5
```

```
d = maxi * total ( findgen ( maxi ) ^ 2 . 0 ) -  
(total(findgen(maxi))^2.0)
```

```
sumx=total(findgen(maxi))
```

```
outplane=inplane
```

```
outplane[*]=0
```

```
sumy=outplane
```

```
sumxy=outplane
```

```
for i=11,maxi do begin
```

```
sm=(2i)+11
```

```
mn=smooth(inplane,sm,/edge)
```

```
var=sqrt(smooth((inplane-mn)2,sm,/edge) > 0)
```

```
tst=where(var lt thresh*mn,nc)
```

```
if nc gt 0 then outplane[tst]=i
```

```
tst=0
```

```

    sumy=var+temporary(sumy)
    sumxy=i*var+temporary(sumxy)
    var=0
endfor
slopes=(maxi*sumxy-sumx*sumy)/(d>1)
offsets=abs(sumy-slopes*sumx)/maxi
sumx=0
sumxy=0

return
end

```

RANGE

```
PRO ga_range, in, out, w, s
```

```
; Local Range Values (Also Called Morphological Gradient)
```

```
; scale input
```

```
tmp1 = gs_discretize(in)
```

```
tmp2 = tmp1
```

```
mse = gs_mselt(w,s)
```

```
:: Dilating input
```

```
tmp1 = gs_padimage(tmp1,w)
```

```
tmp1 = dilate(tmp1,mse,/gray,/ulong)
```

```
tmp1 = gs_padimage(tmp1,w,/unpad)
```

```
:: Eroding input
```

```
tmp2 = gs_padimage(tmp2,w)
```

```
tmp2 = erode(tmp2, mse, /gray,/ulong)
```

```
tmp2 = gs_padimage(tmp2,w,/unpad)
```

```
:: Then take Difference
```

```
:: rescale output
```

```
tmp1 = gs_discretize(tmp1,/undo)
```

```
tmp2 = gs_discretize(tmp2,/undo)
```

```
out = abs(tmp1 - tmp2)
```

```
END
```

```
ASF_CLOP
```

```
PRO ga_asf_clop, in, out, N, s
```

```
; Alternating Sequential Filters (Close-Open)
```

```
; scale input
```

```
tmp = gs_discretize(in)
```

```
for w = 1, N do begin
```

```
    mse = gs_mselt(w,s)
```

```
; Close (Dilate-Erode)
```

```
tmp = gs_padimage(tmp,w)
```

```
tmp = dilate(tmp,mse,/gray,/ulong)
```

```
tmp = gs_padimage(tmp,w,/unpad)
```

```
tmp = gs_padimage(tmp,w)
```

```
tmp = erode(tmp,mse,/gray,/ulong)
```

```
tmp = gs_padimage(tmp,w,/unpad)
```

```
; Close (Erode-Dilate)
```

```
tmp = gs_padimage(tmp,w)
```

```
tmp = erode(tmp,mse,/gray,/ulong)
```

```
tmp = gs_padimage(tmp,w,/unpad)
```

```
tmp = gs_padimage(tmp,w)
```

```
tmp = dilate(tmp, mse, /gray,/ulong)
```

```

    tmp = gs_padimage(tmp,w,/unpad)

end

; rescale output
    out = gs_discretize(tmp,/undo)

END

DILATE

PRO ga_dilate, in, out, w, s
;+
; GA Project: out[n] = min( in[i] ) for all i within w of n
;-
    w=(w>0)

    mse = gs_mselt(w,s)

;; scale input
    tmp = gs_discretize(in)

    tmp = gs_padimage(tmp,w)
    tmp = dilate(tmp,mse,/gray,/ulong)
    tmp = gs_padimage(tmp,w,/unpad)

;; rescale output
    out = gs_discretize(tmp,/undo)

END

ERODE

RO ga_erode, in, out, w, s
;+
; GA Project: out[n] = min( in[i] ) for all i within w of n

    w=(w>0)

```

```

    mse = gs_mselt(w,s) ;morphological structure element

;; scale input
    tmp = gs_discretize(in)

    tmp = gs_padimage(tmp,w)
    tmp = erode(tmp,mse,/gray,/ulong)
    tmp = gs_padimage(tmp,w,/unpad)

;; rescale output
    out = gs_discretize(tmp,/undo)

END

OPEN_CLOSE

PRO ga_open_close, in, out, w, s

;; Erode - Dilate - Dilate - Erode

;; scale input
    tmp = gs_discretize(in)

    mse = gs_mselt(w,s)

;; Open (Erode-Dilate)

    tmp = gs_padimage(tmp,w)
    tmp = erode(tmp,mse,/gray,/ulong)
    tmp = gs_padimage(tmp,w,/unpad)

    tmp = gs_padimage(tmp,w)
    tmp = dilate(tmp,mse,/gray,/ulong)
    tmp = gs_padimage(tmp,w,/unpad)

;; Close (Dilate-Erode)

    tmp = gs_padimage(tmp,w)

```

```
tmp = dilate(tmp,mse,/gray,/ulong)
tmp = gs_padimage(tmp,w,/unpad)
```

```
tmp = gs_padimage(tmp,w)
tmp = erode(tmp, mse, /gray,/ulong)
tmp = gs_padimage(tmp,w,/unpad)
```

```
:: rescale output
out = gs_discretize(tmp,/undo)
```

END

SOBELGRADIENT

PRO ga\_sobel\_grad, in, out

;;+

:GA Project: Finds the absolute sobel gradient magnitude

;

;;-

```
k = [[1, 0, -1],$
      [2, 0, -2],$
      [1, 0, -1]]
```

```
out = sqrt( gs_convolve(in,k)^2 + gs_
convolve(in,transpose(k))^2)
```

END

CLOSE\_OPEN

PRO ga\_close\_open, in, out, w, s

```
:: Dilate - Erode - Erode - Dilate
```

```
:: scale input
```

```
tmp = gs_discretize(in)
```

```
mse = gs_mselt(w,s)
```

```
:: Close (Dilate-Erode)
```

```
tmp = gs_padimage(tmp,w)
tmp = dilate(tmp,mse,/gray,/ulong)
tmp = gs_padimage(tmp,w,/unpad)
```

```
tmp = gs_padimage(tmp,w)
tmp = erode(tmp, mse, /gray,/ulong)
tmp = gs_padimage(tmp,w,/unpad)
```

```
:: Open (Erode-Dilate)
```

```
tmp = gs_padimage(tmp,w)
tmp = erode(tmp,mse,/gray,/ulong)
tmp = gs_padimage(tmp,w,/unpad)
```

```
tmp = gs_padimage(tmp,w)
tmp = dilate(tmp,mse,/gray,/ulong)
tmp = gs_padimage(tmp,w,/unpad)
```

```
:: rescale output
```

```
out = gs_discretize(tmp,/undo)
```

END
