# Supplementary material for: A Method for the Interpretation of Flow Cytometry Data Using Genetic Algorithms
Source: PubMed Central journal article supplement — J Pathol Inform. 2018 Apr 20;9:16. doi: 10.4103/jpi.jpi_76_17 (PMC5937296; doi:10.4103/jpi.jpi_76_17), 2018-04-20
Supplement: JPI-9-16_Suppl2.pdf [file JPI-9-16_Suppl2.pdf]

## SUPPLEMENTARY FIGURES

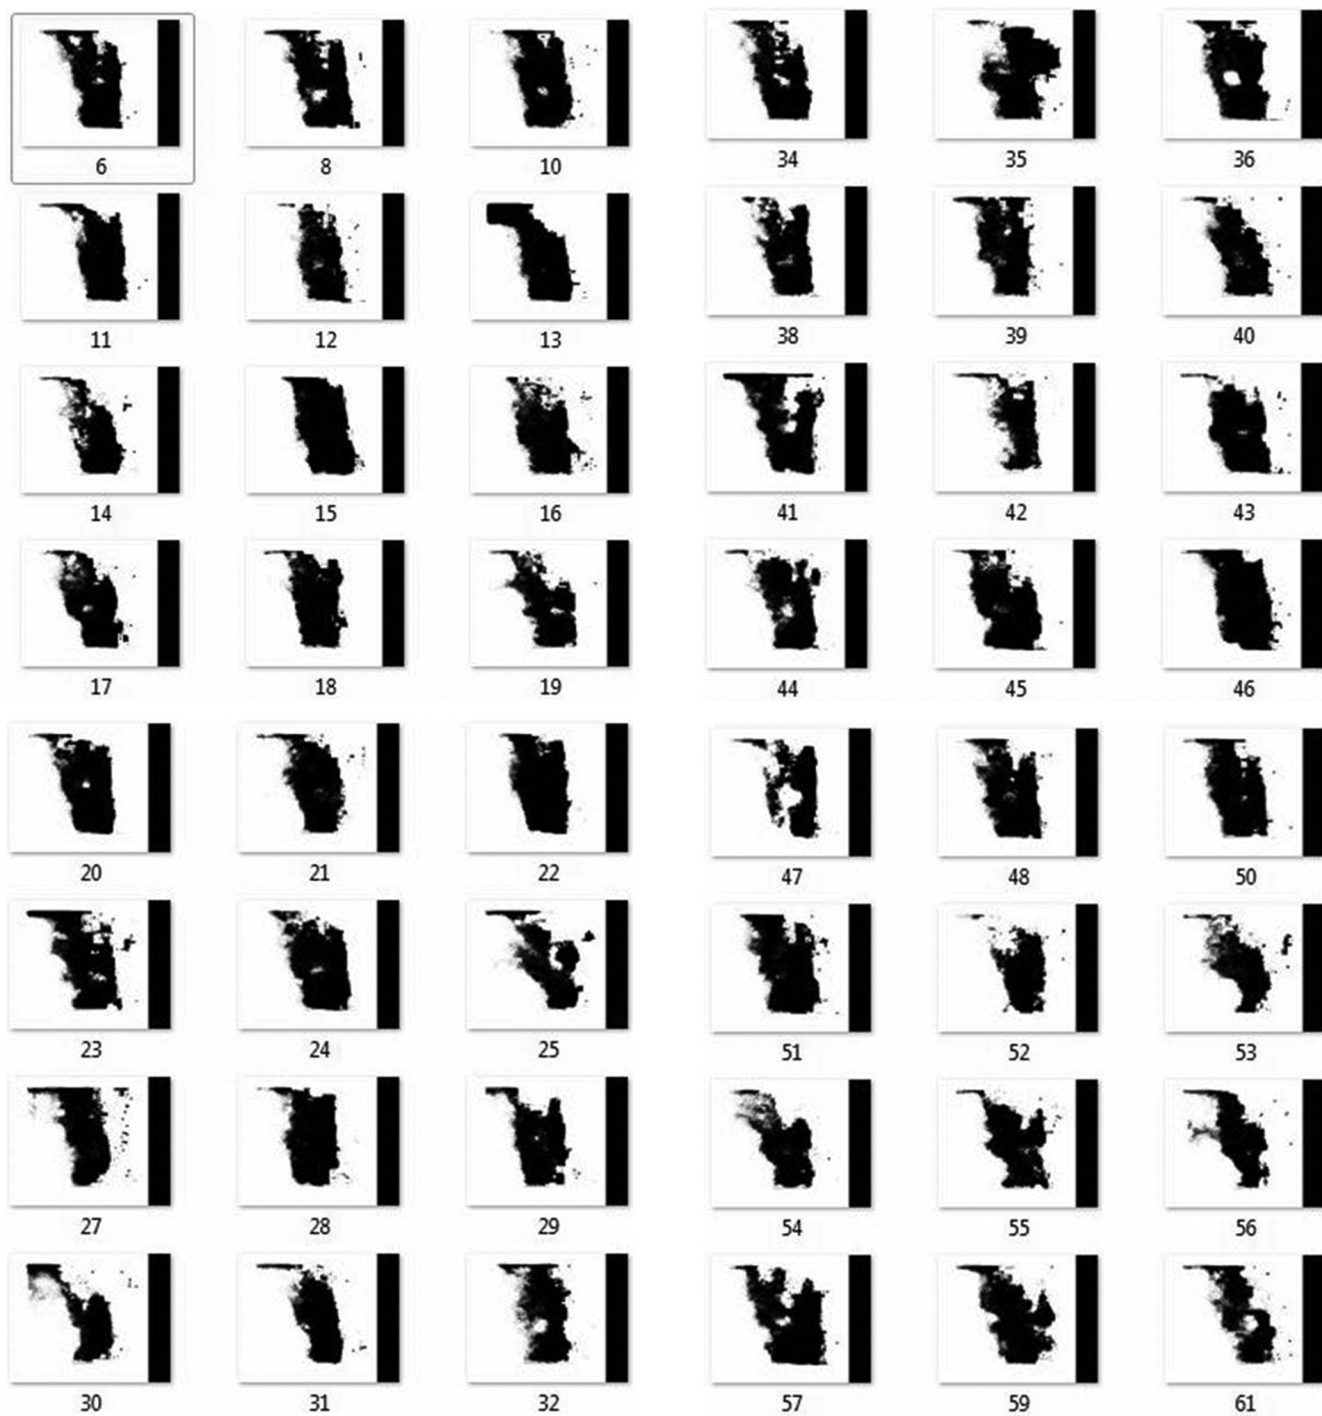

**Supplementary Figure 1a:** Result planes obtained by applying mathematical algorithm 018330 to flow cytometry FITS files from normal Subjects

**Supplementary Figure 1a:** Contd...

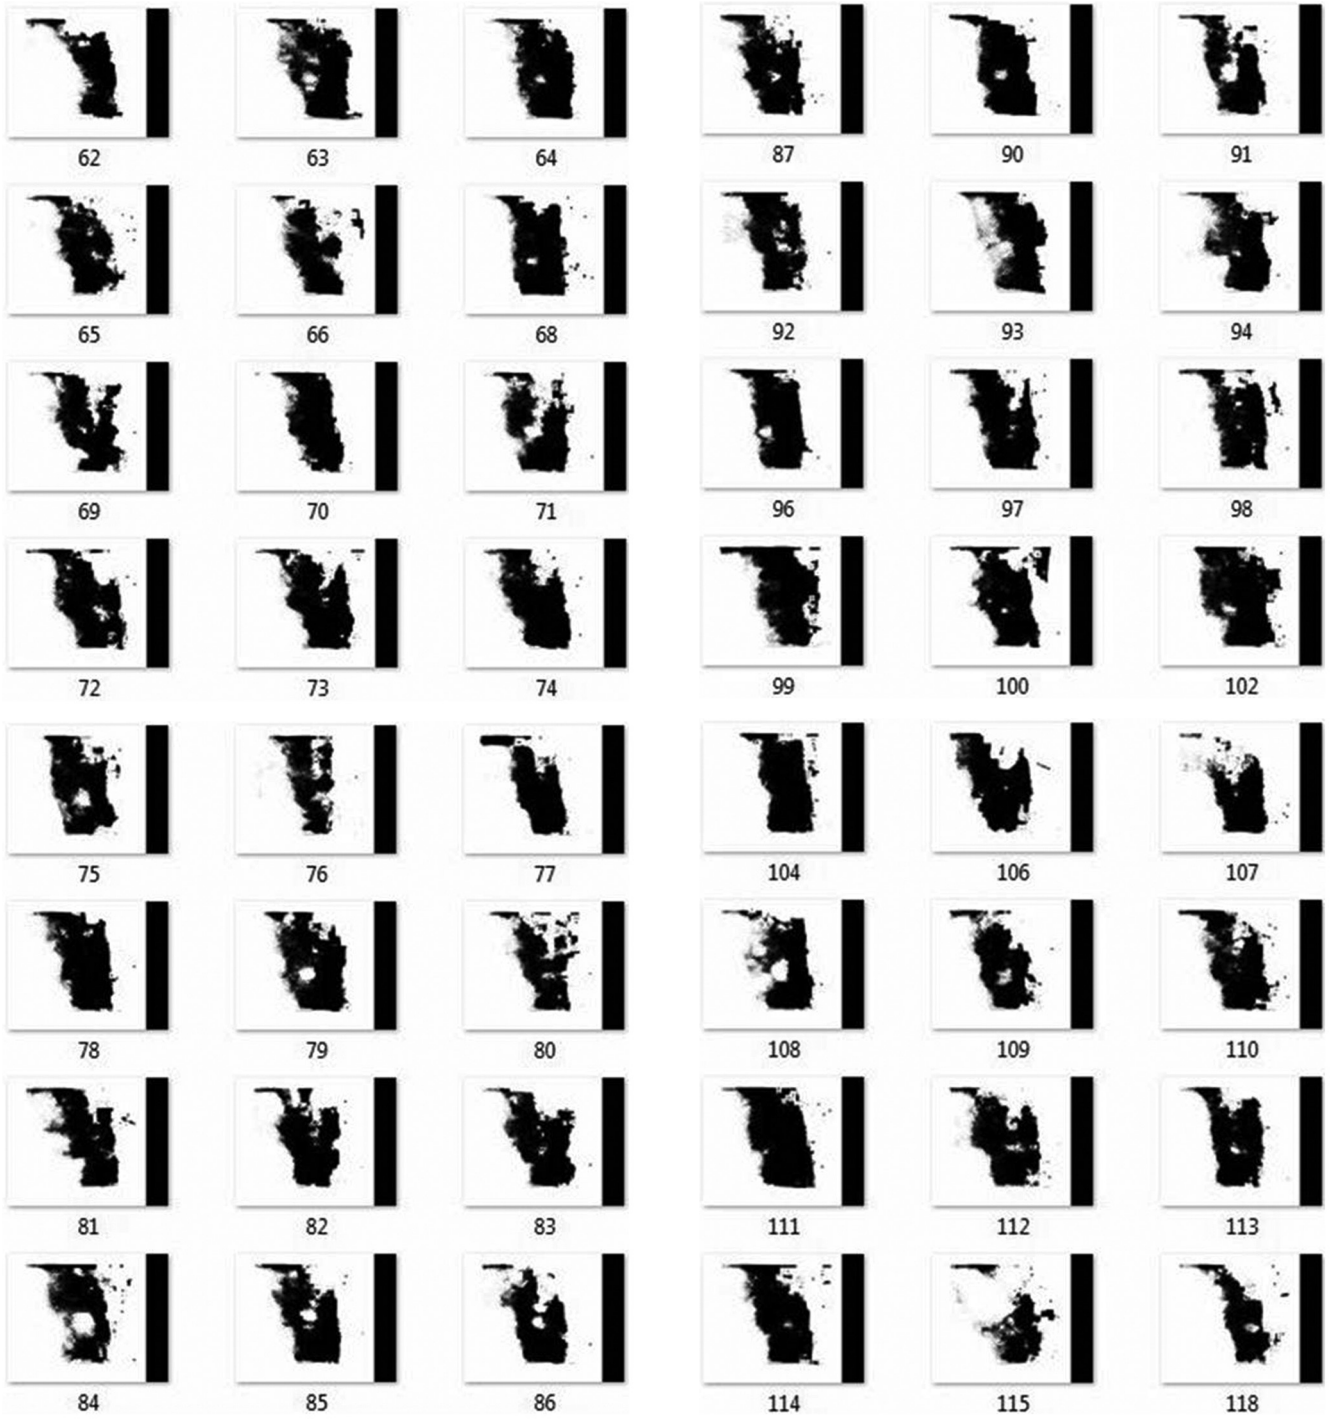

Supplementary Figure 1a: Contd...

Supplementary Figure 1a: Contd...

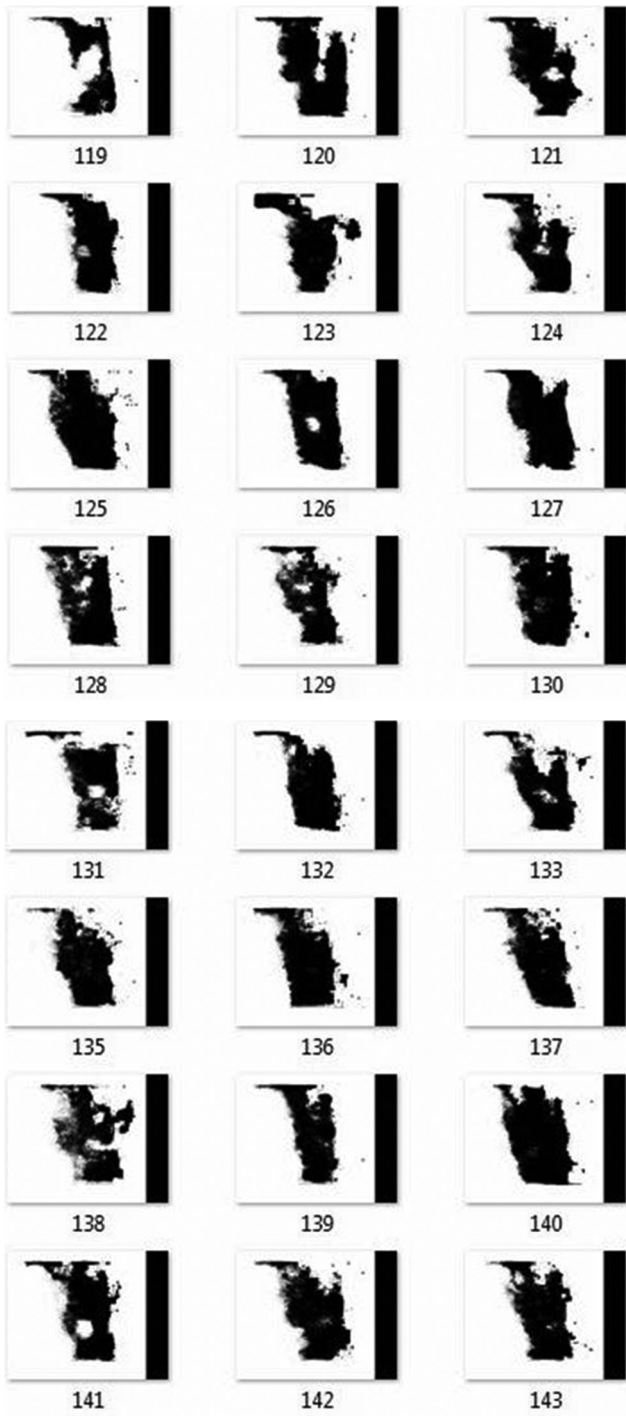

Supplementary Figure 1a: Contd...

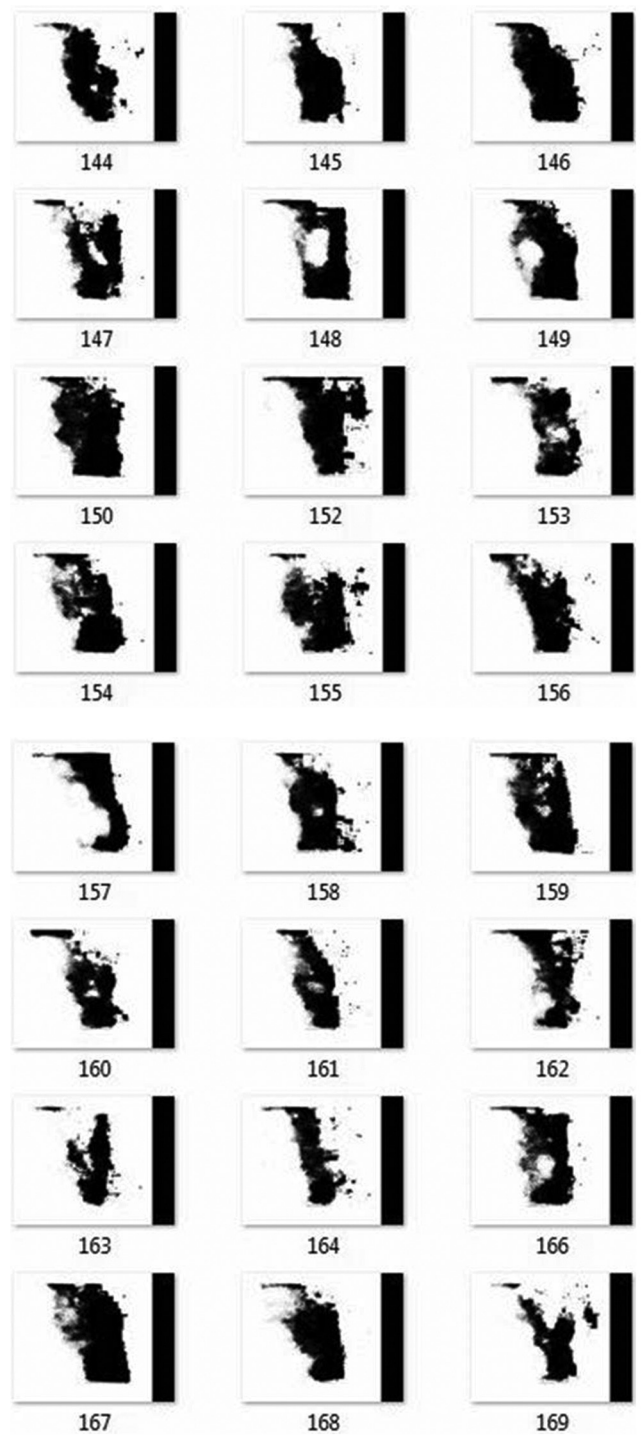

Supplementary Figure 1a: Contd...

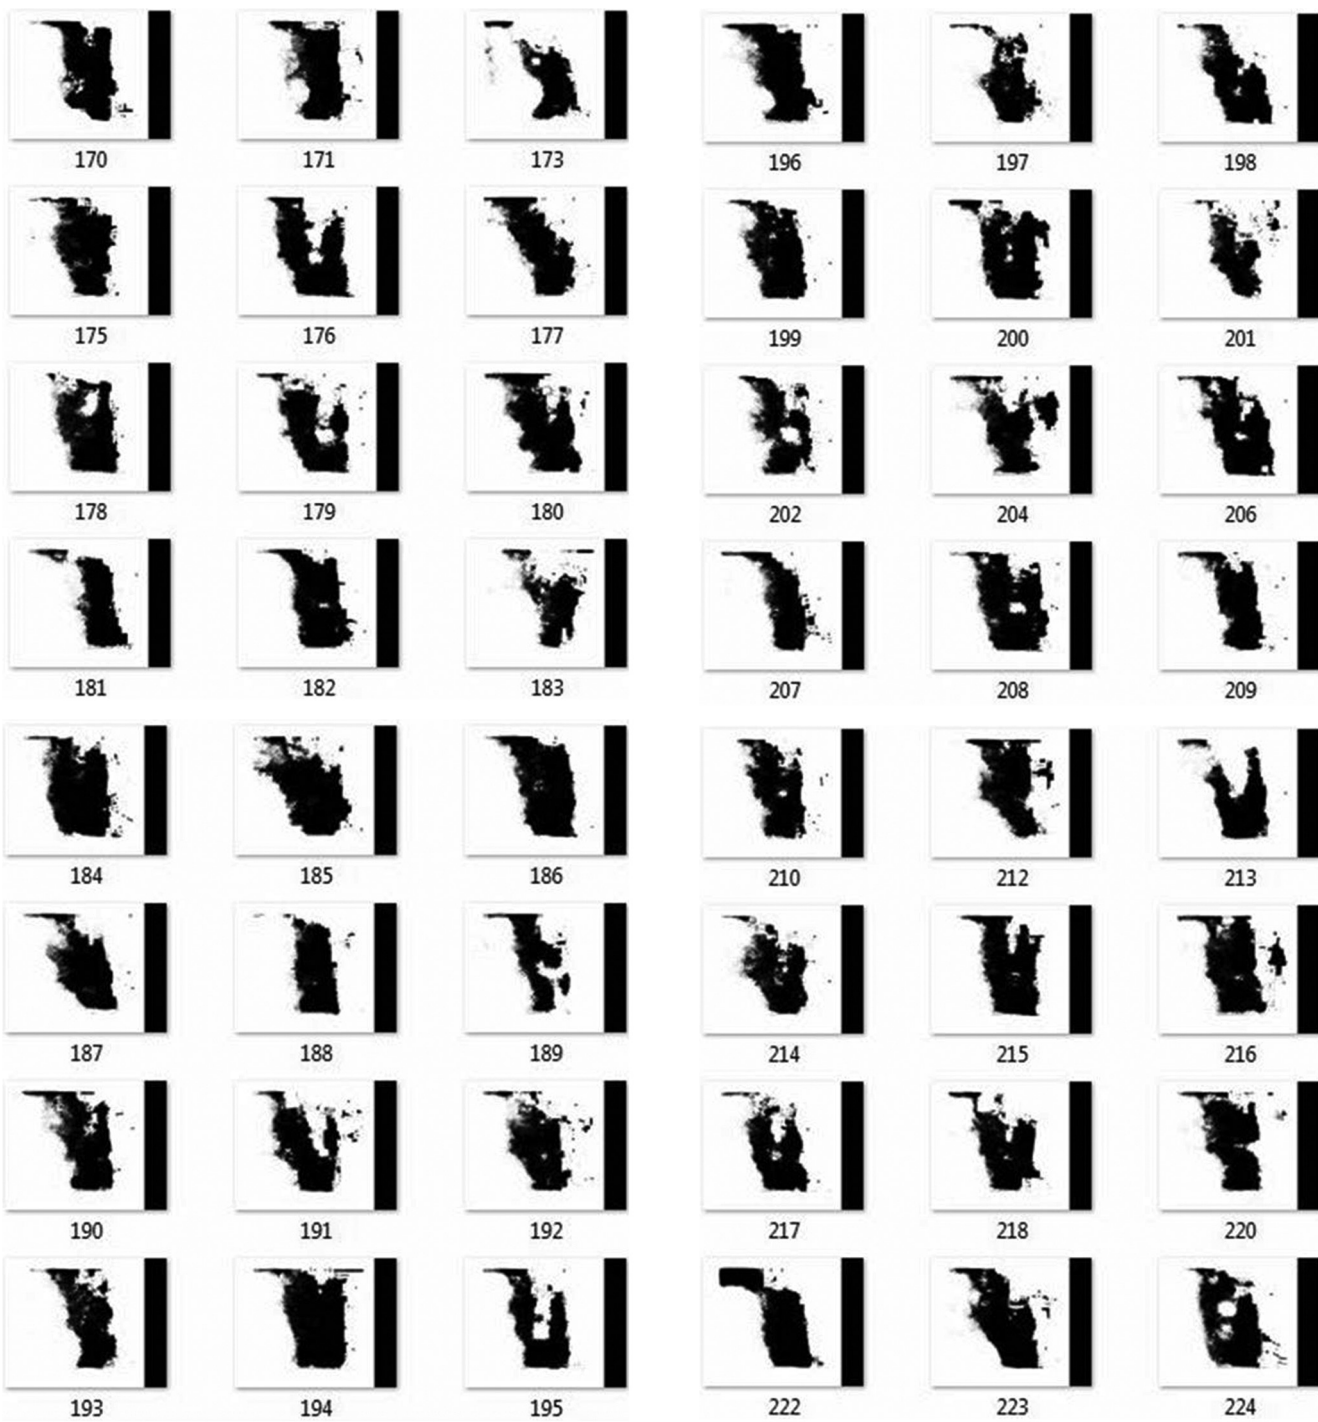

Supplementary Figure 1a: Contd...

Supplementary Figure 1a: Contd...

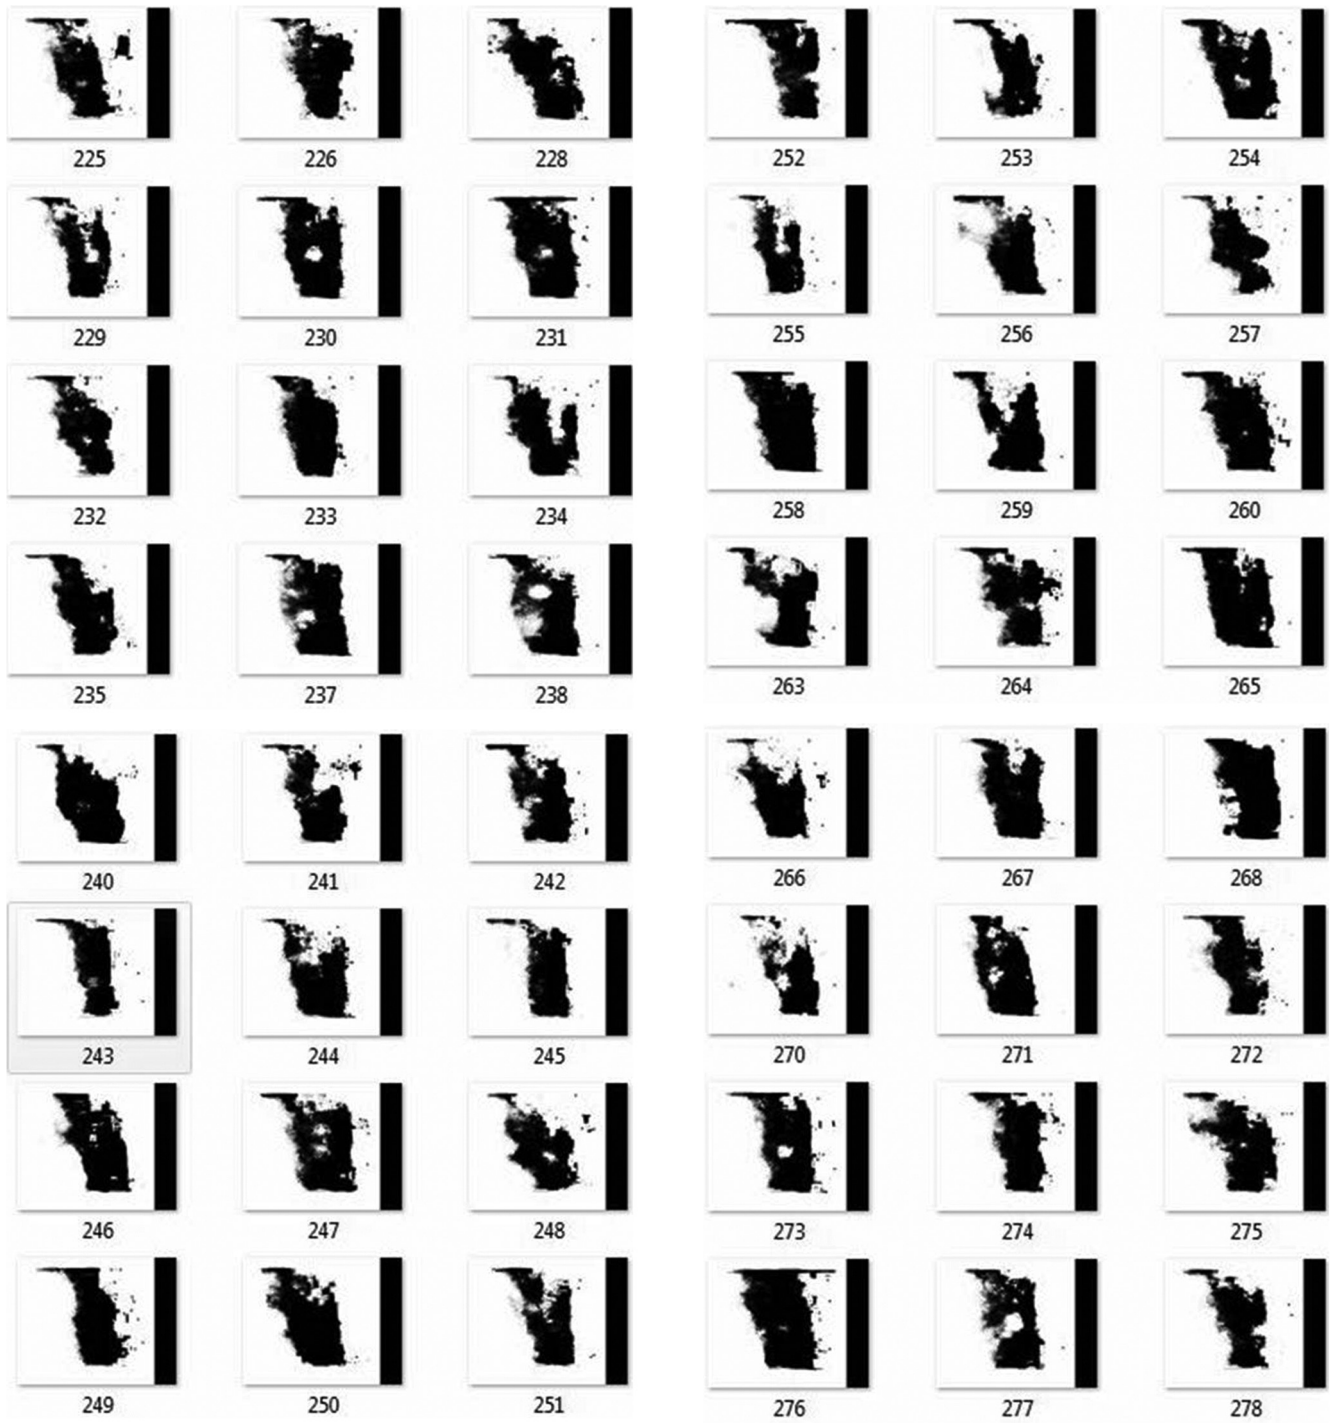

Supplementary Figure 1a: Contd...

Supplementary Figure 1a: Contd...

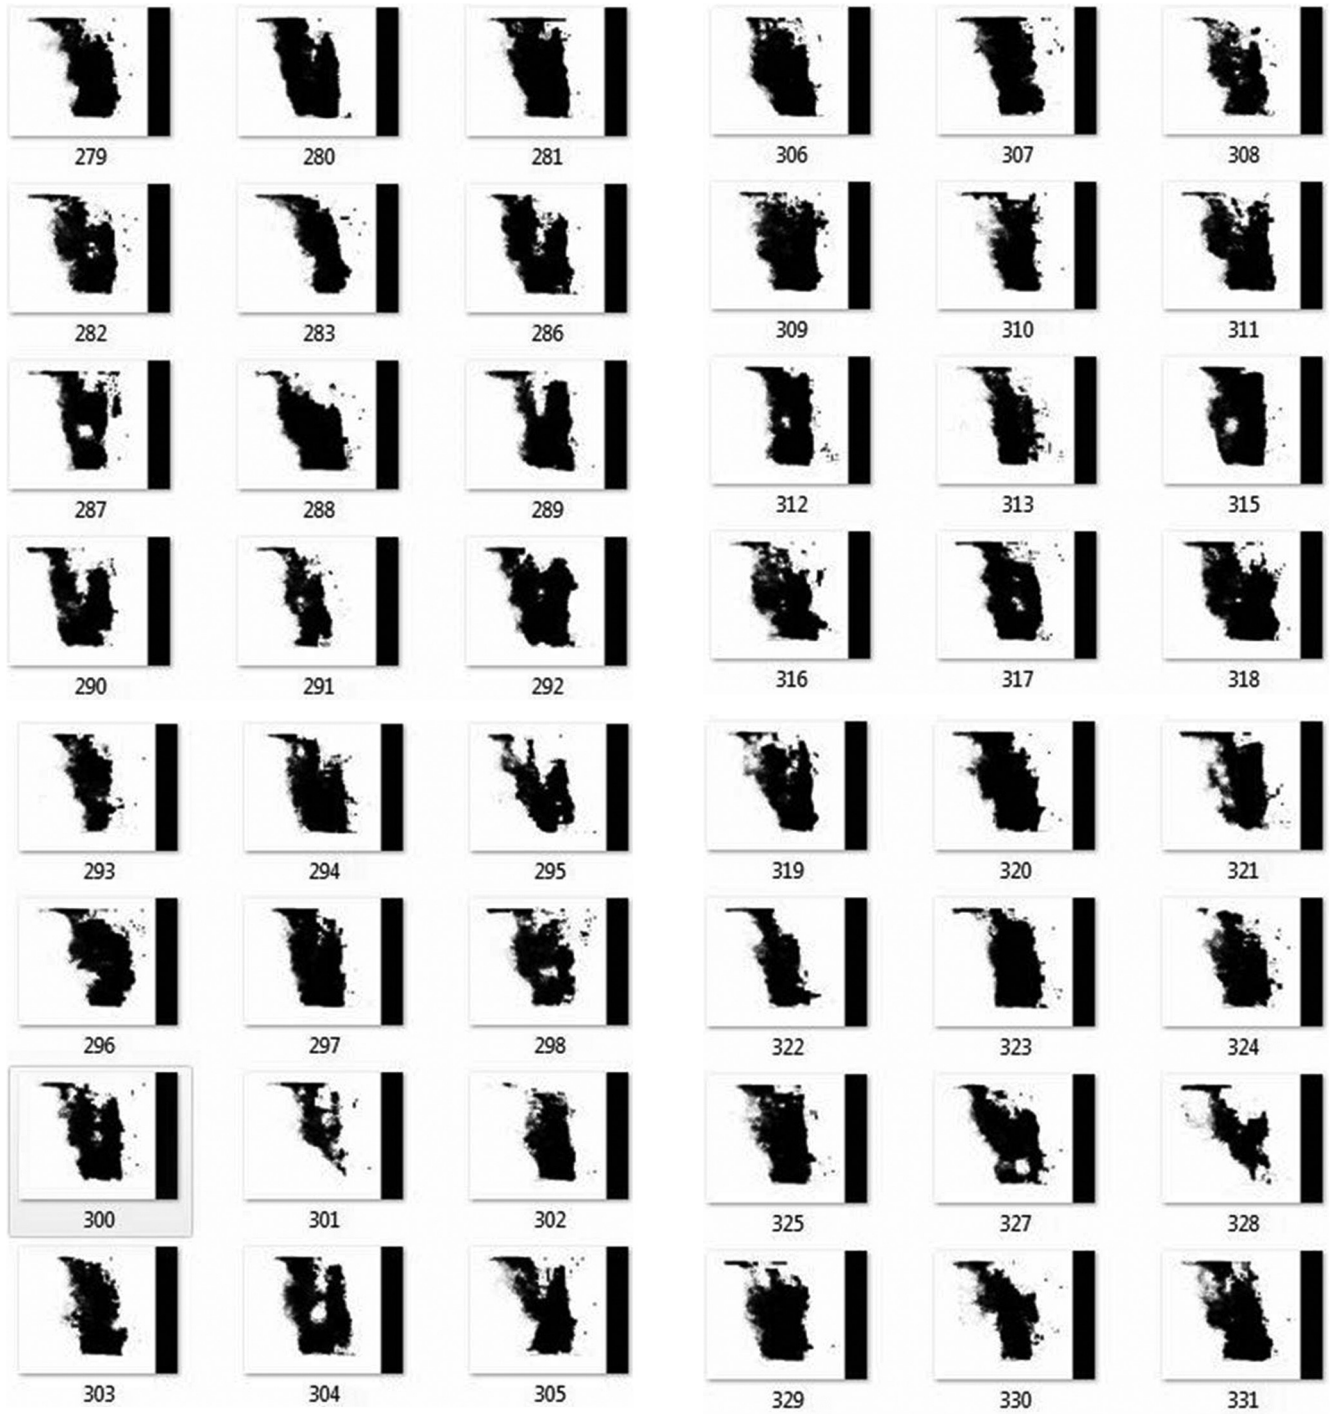

Supplementary Figure 1a: Contd...

Supplementary Figure 1a: Contd...

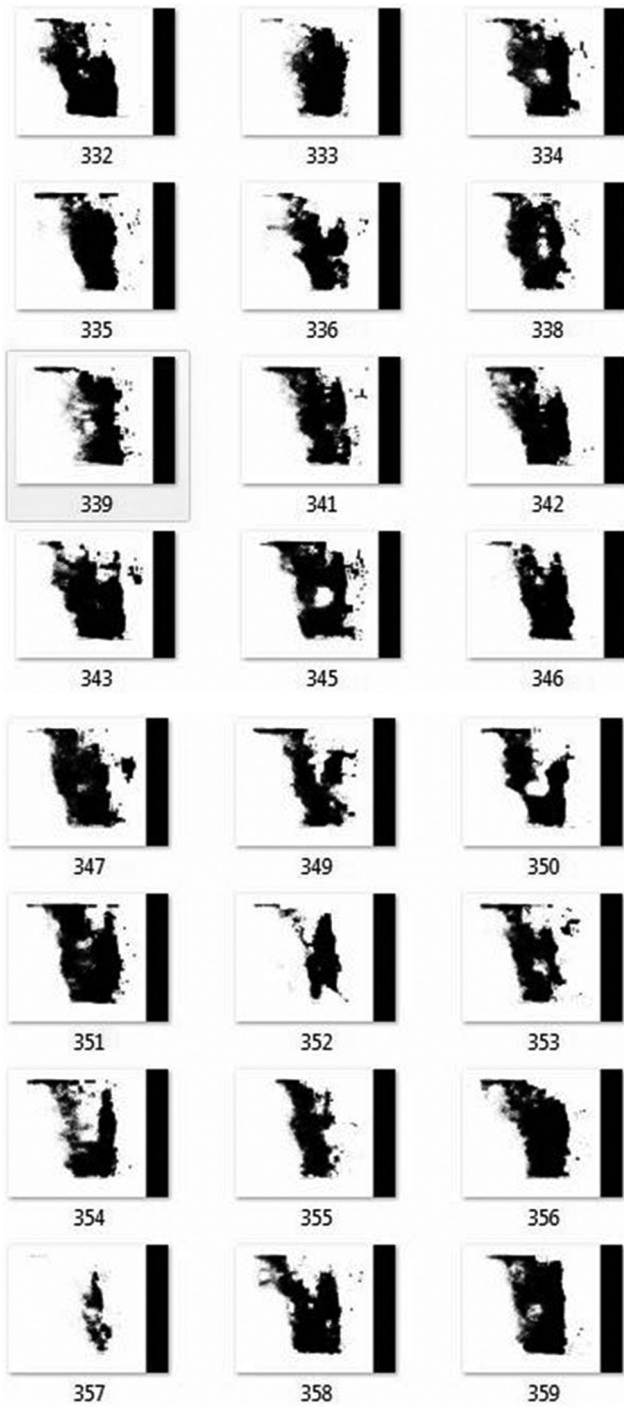

Supplementary Figure 1a: Contd...

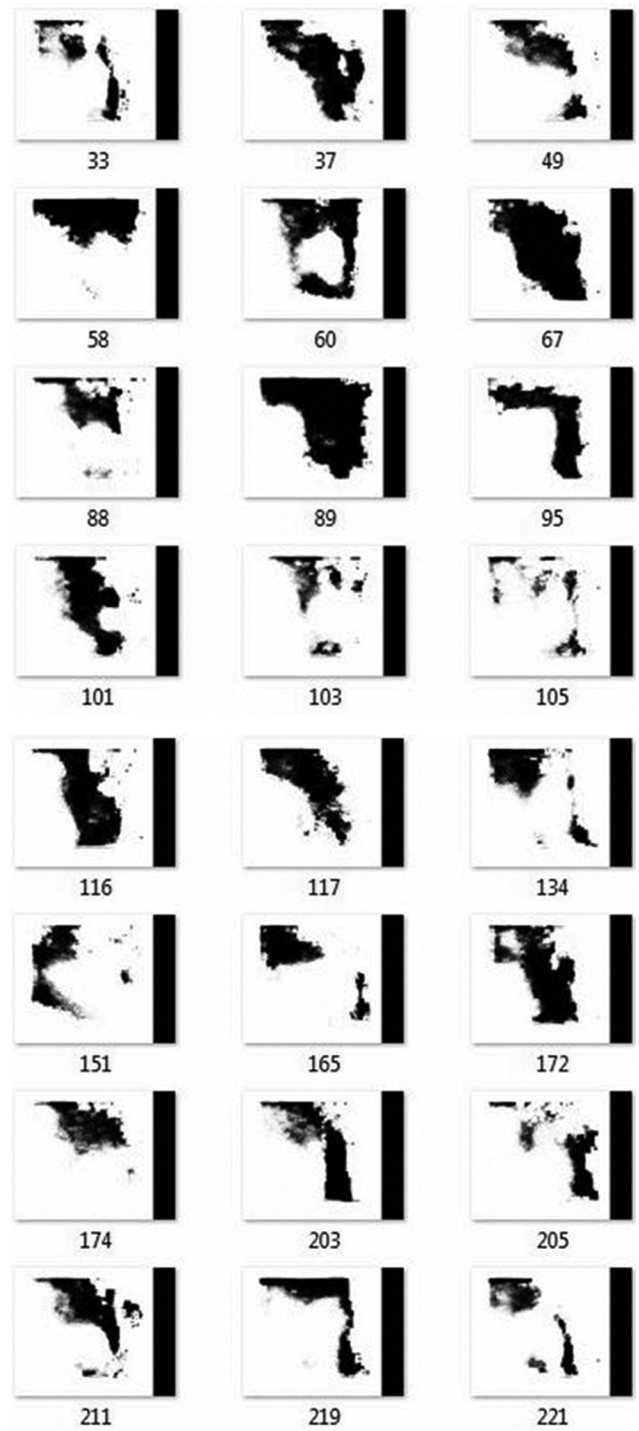

Supplementary Figure 1b: Result planes obtained by applying mathematical algorithm 018330 to flow cytometry FITS files from acute myeloid leukemia subjects

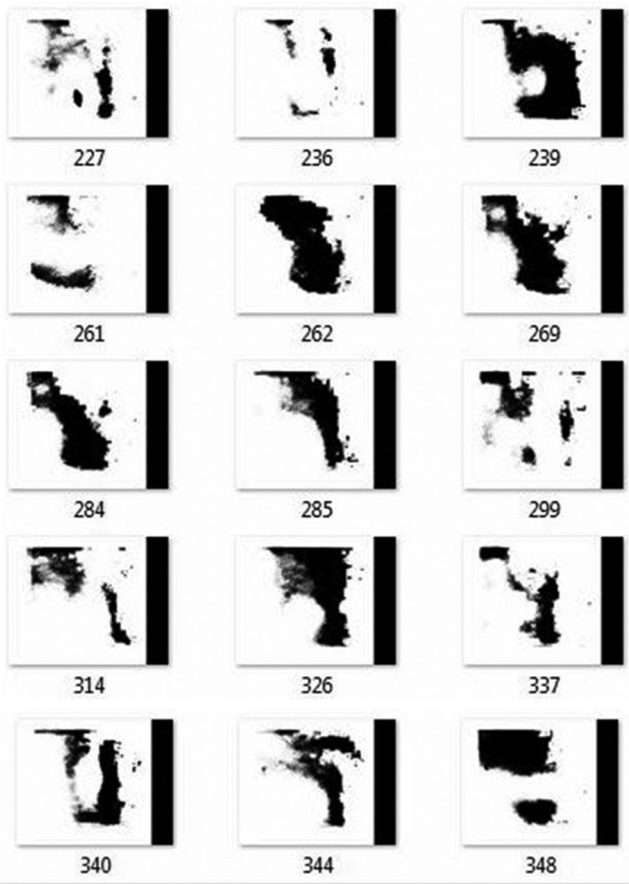

Supplementary Figure 1b: Contd...
