# Supplementary material for: A Method for the Interpretation of Flow Cytometry Data Using Genetic Algorithms
Source: PubMed Central journal article supplement — J Pathol Inform. 2018 Apr 20;9:16. doi: 10.4103/jpi.jpi_76_17 (PMC5937296; doi:10.4103/jpi.jpi_76_17), 2018-04-20
Supplement: JPI-9-16_Suppl3.pdf [file JPI-9-16_Suppl3.pdf]

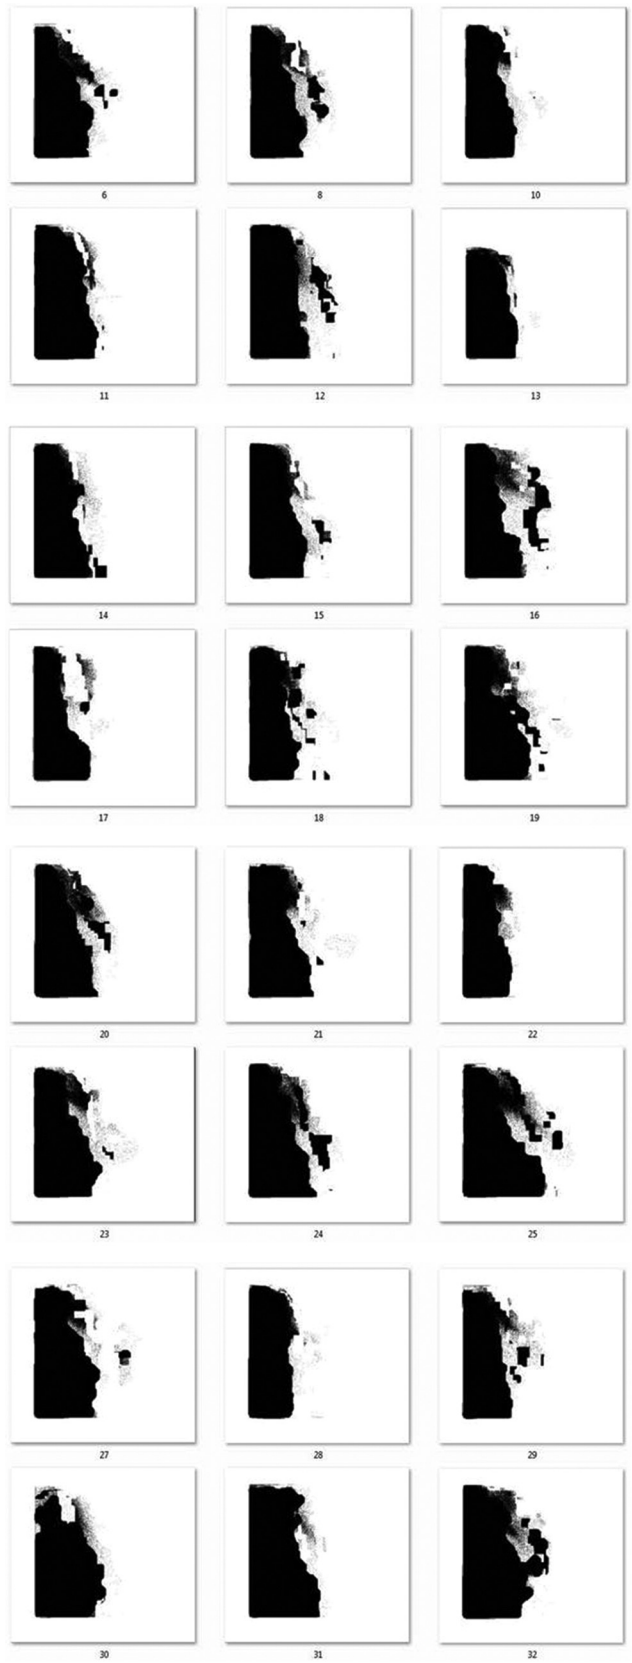

**Supplementary Figure 2a:** Result planes obtained by applying mathematical algorithm 025886 to flow cytometry FITS files from normal subjects

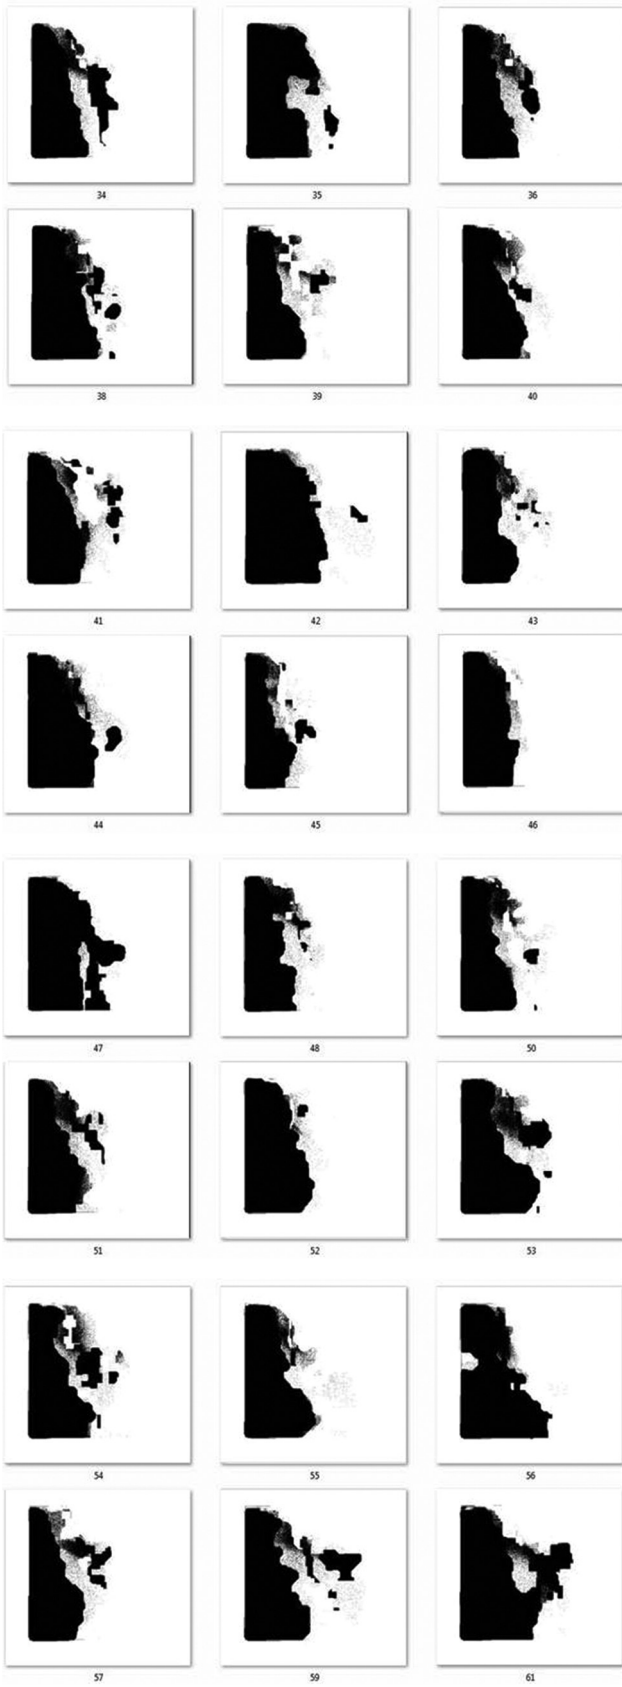

Supplementary Figure 2a: Contd...

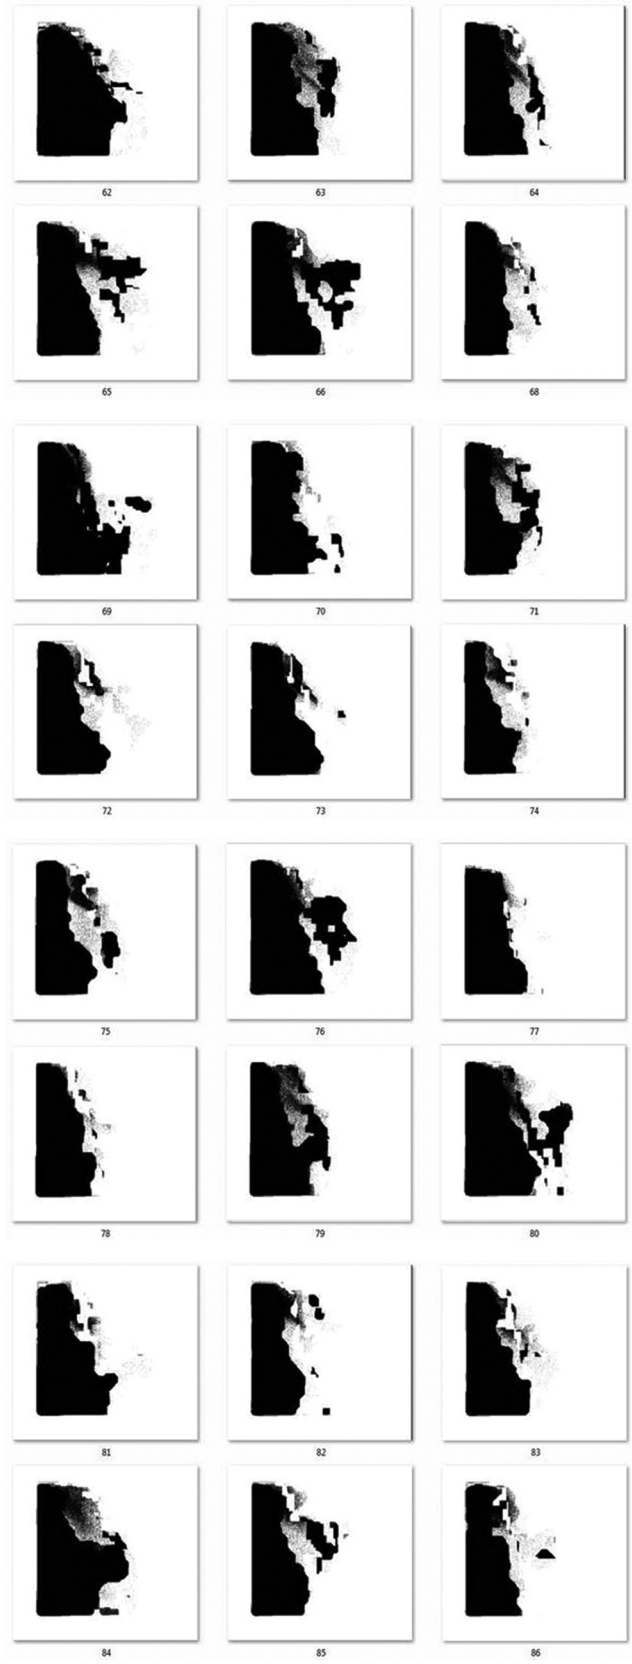

Supplementary Figure 2a: Contd...

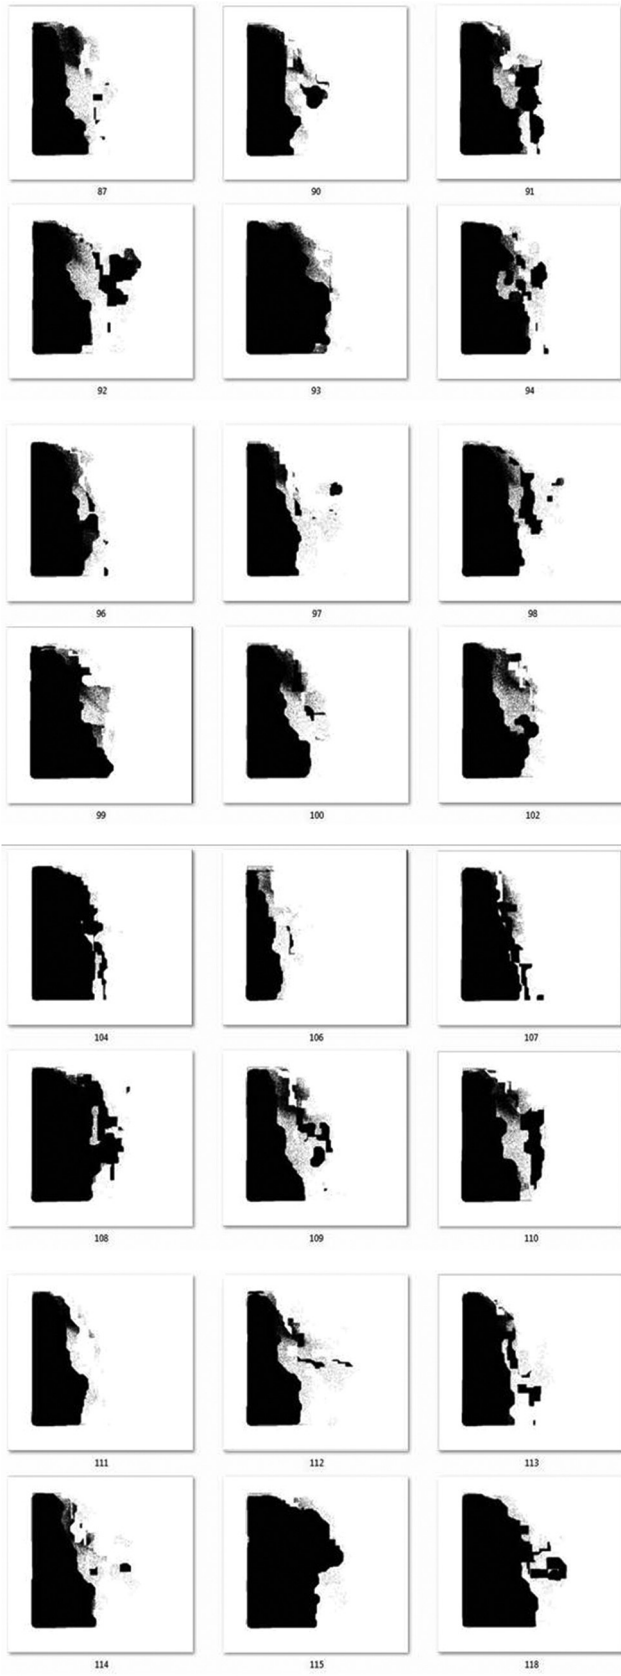

Supplementary Figure 2a: Contd...

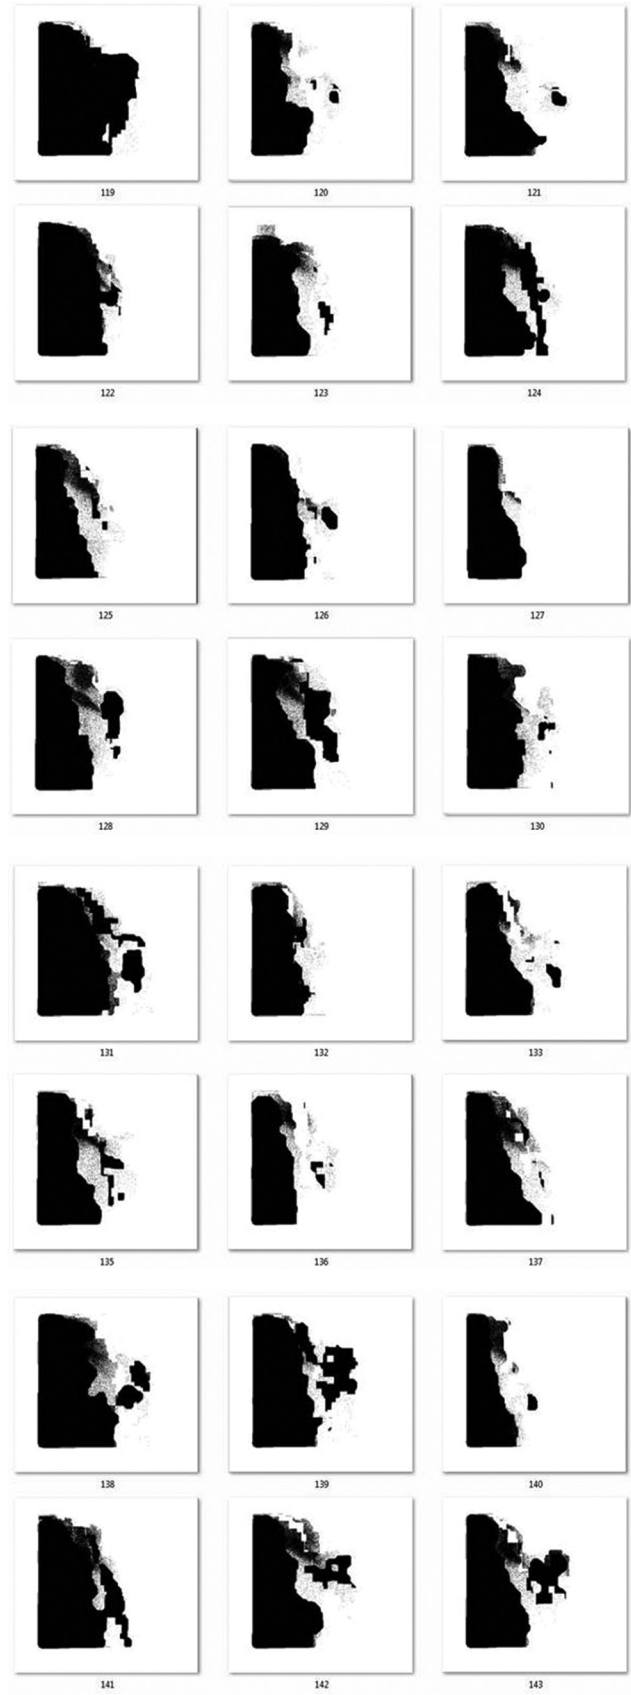

Supplementary Figure 2a: Contd...

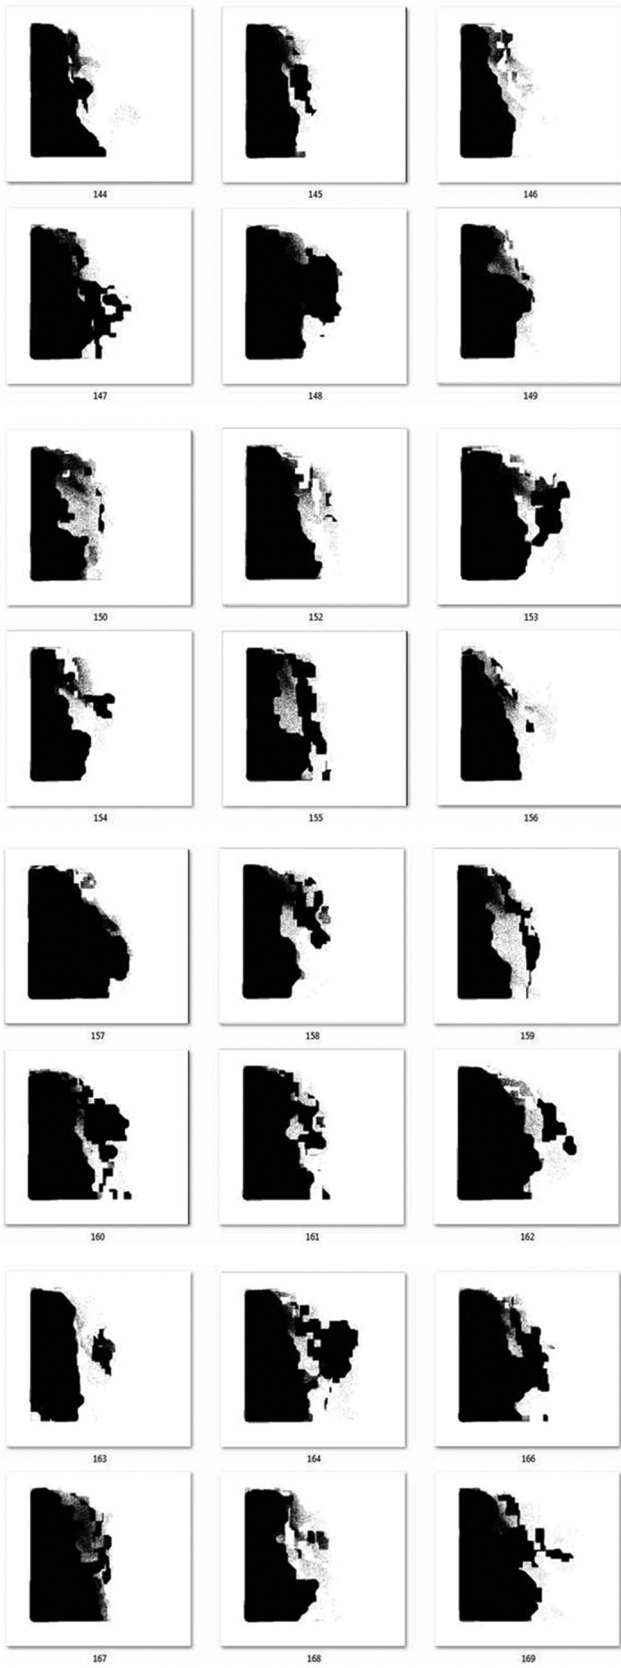

Supplementary Figure 2a: Contd...

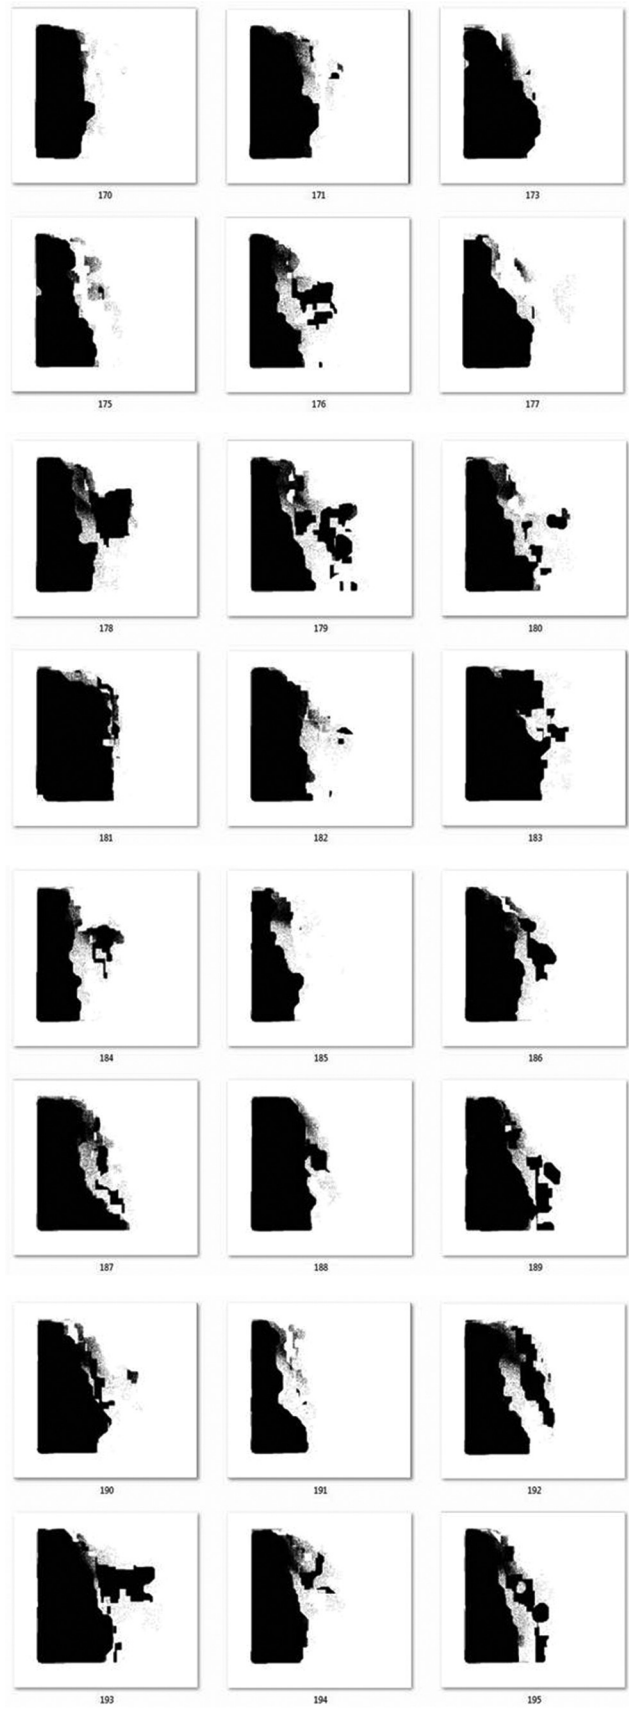

Supplementary Figure 2a: Contd...

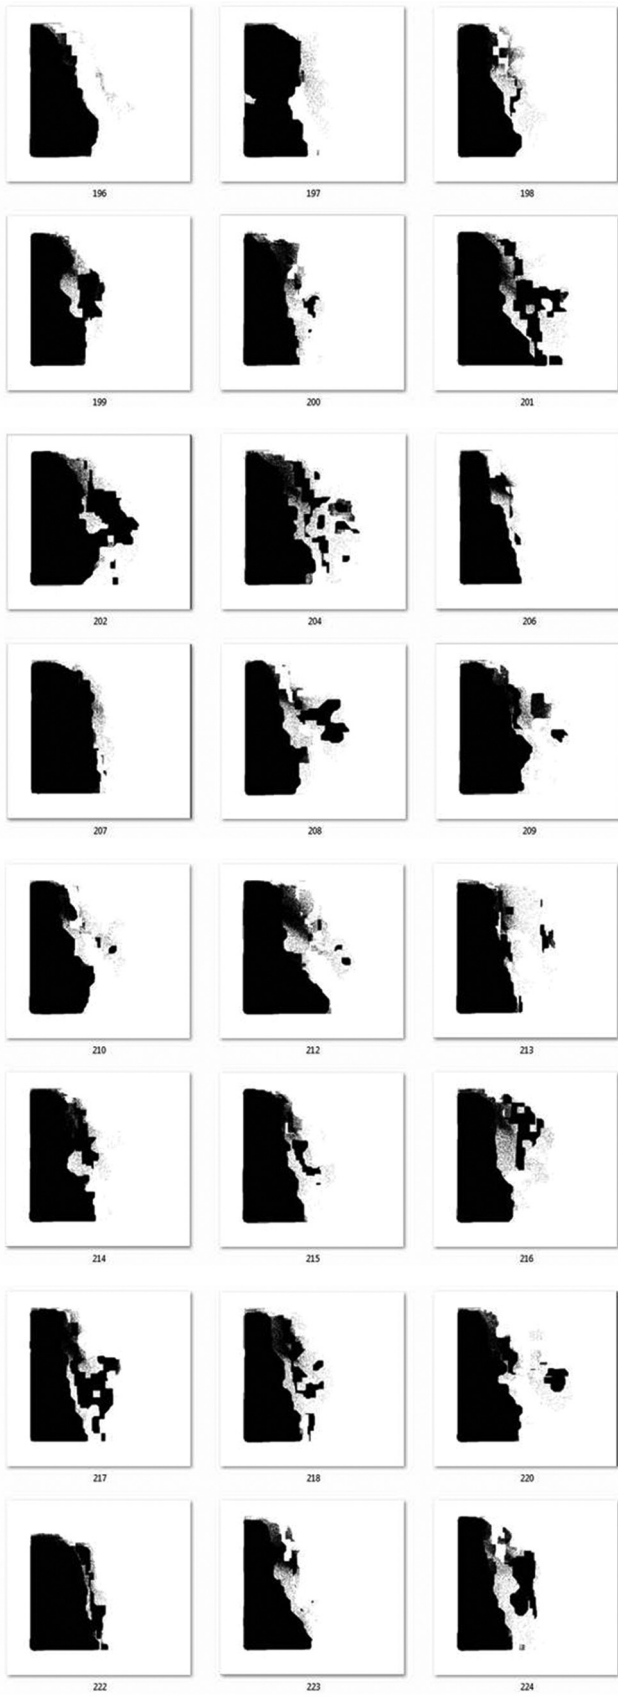

Supplementary Figure 2a: Contd...

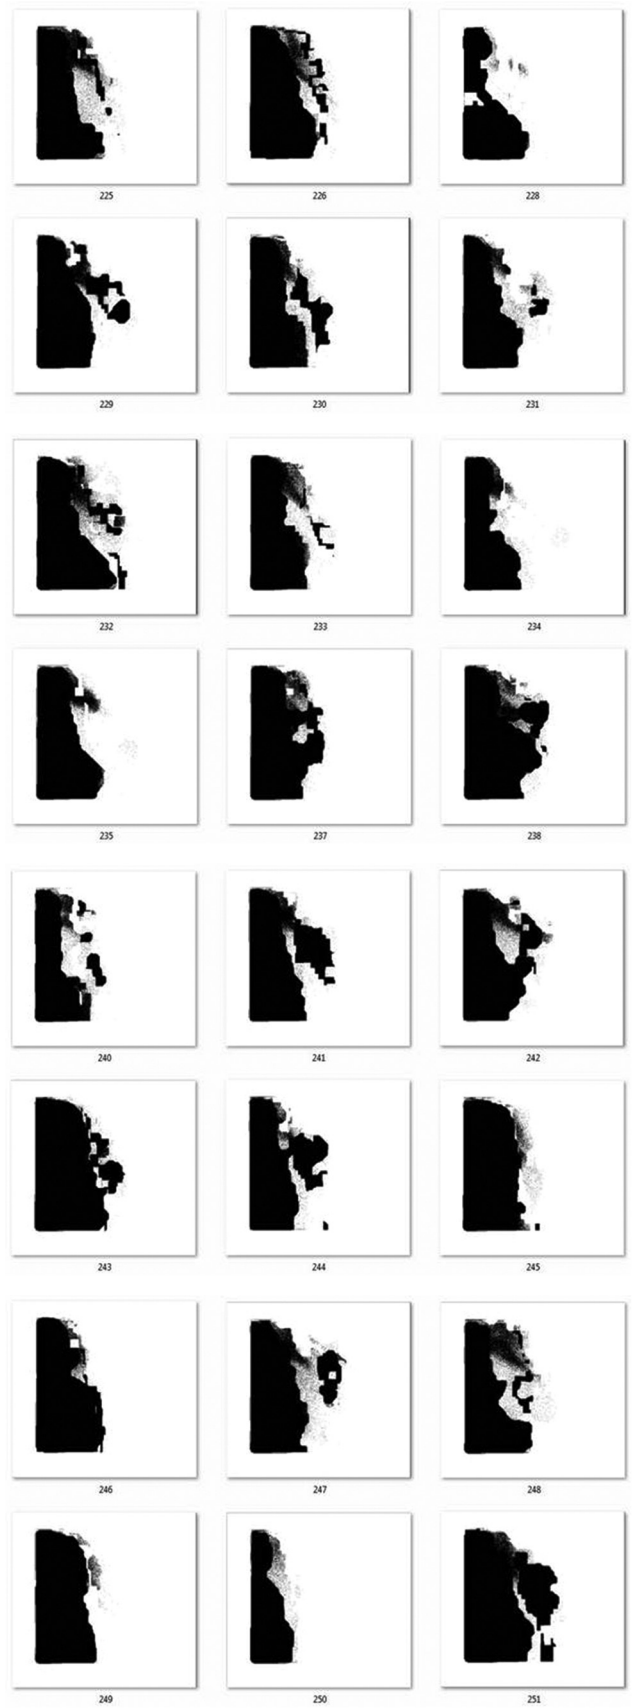

Supplementary Figure 2a: Contd...

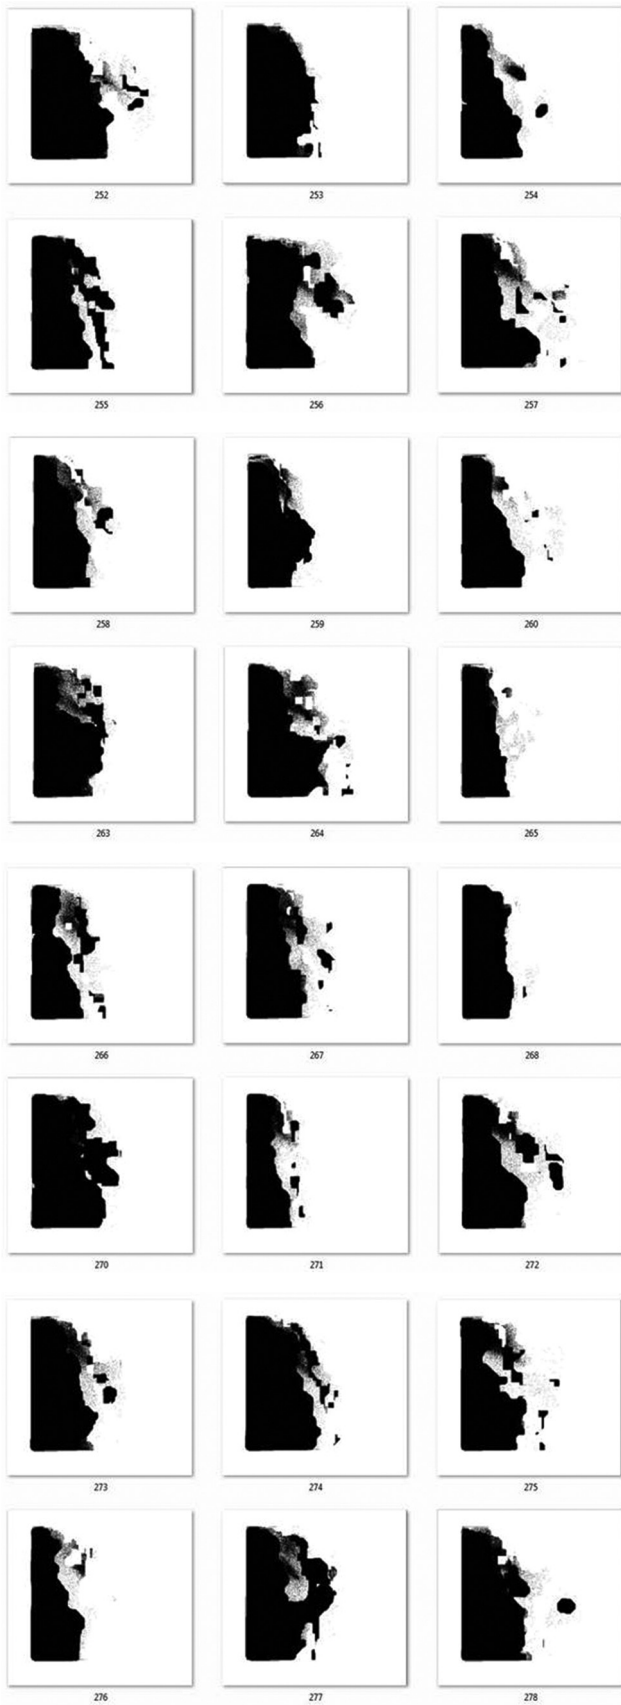

Supplementary Figure 2a: Contd...

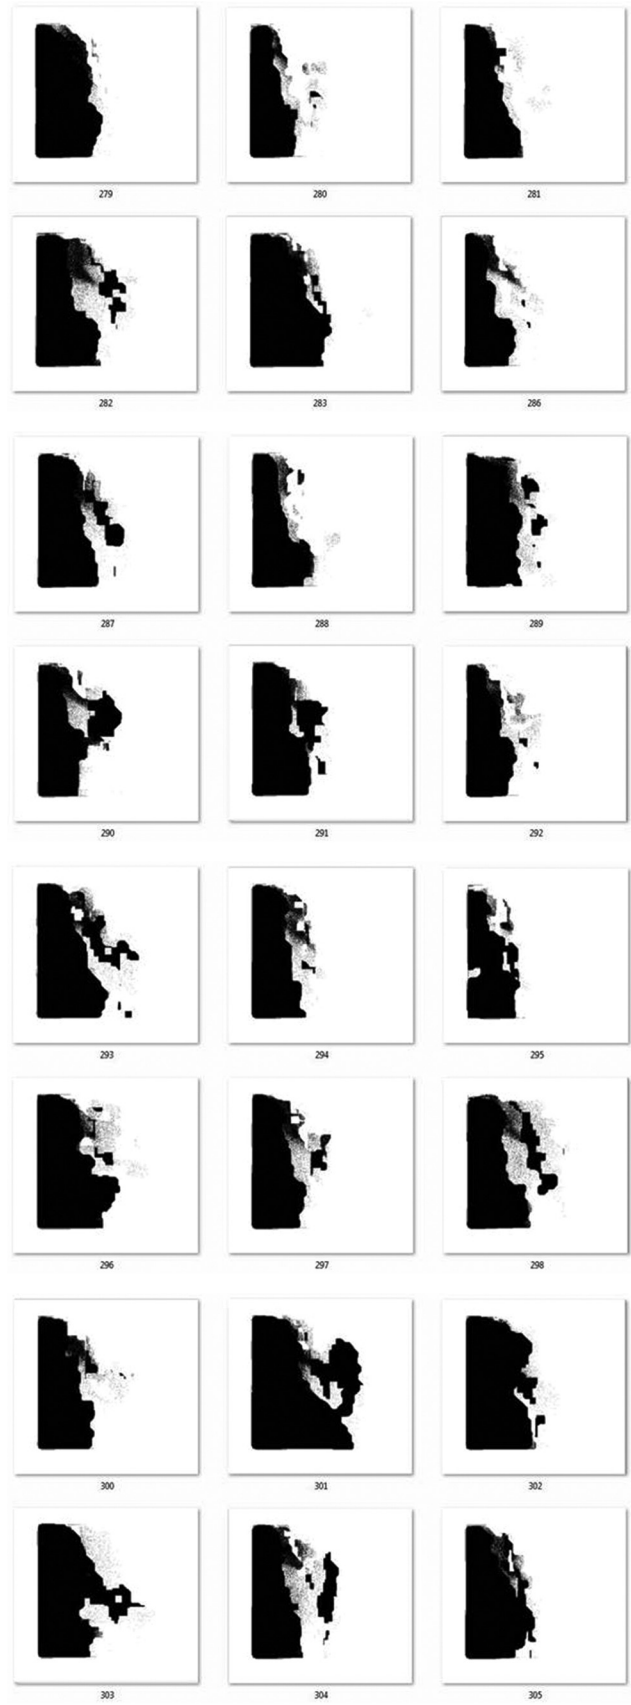

Supplementary Figure 2a: Contd...

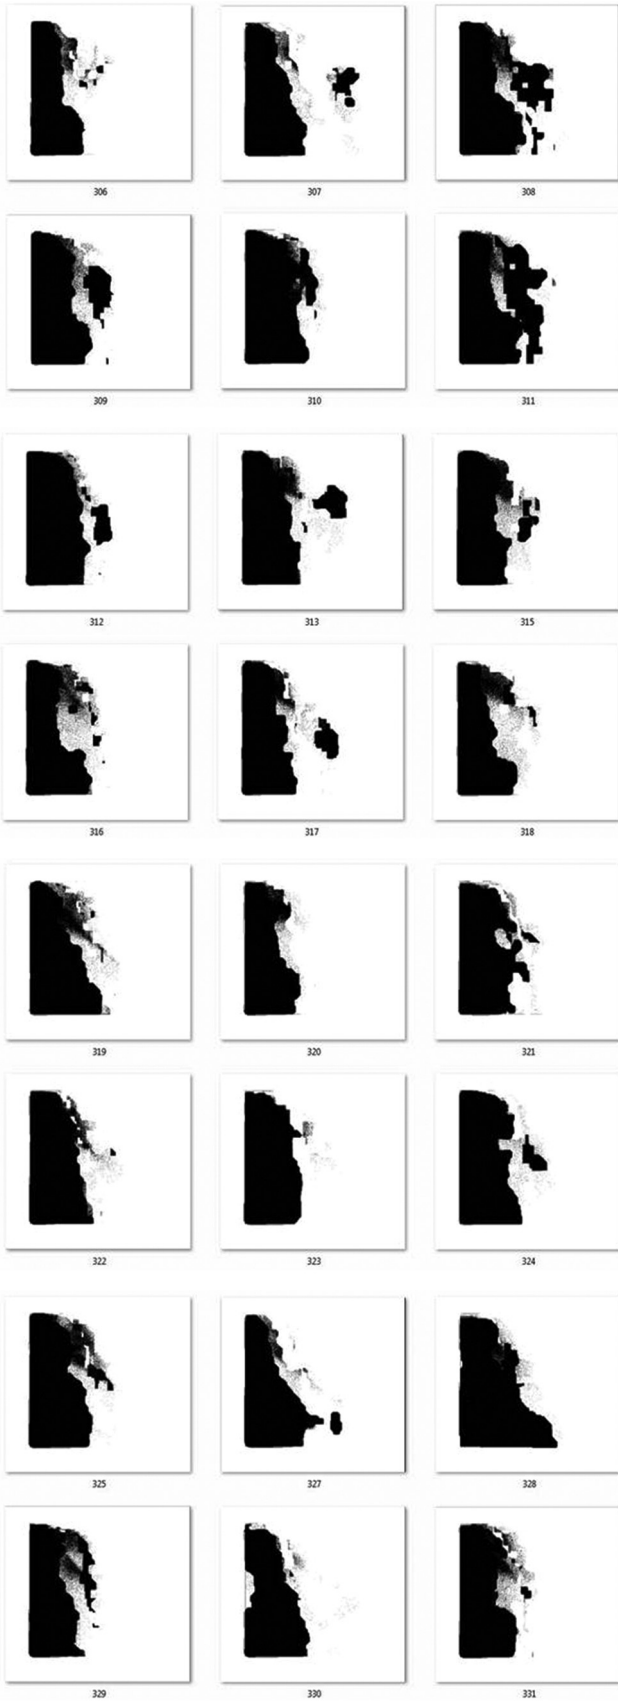

Supplementary Figure 2a: Contd...

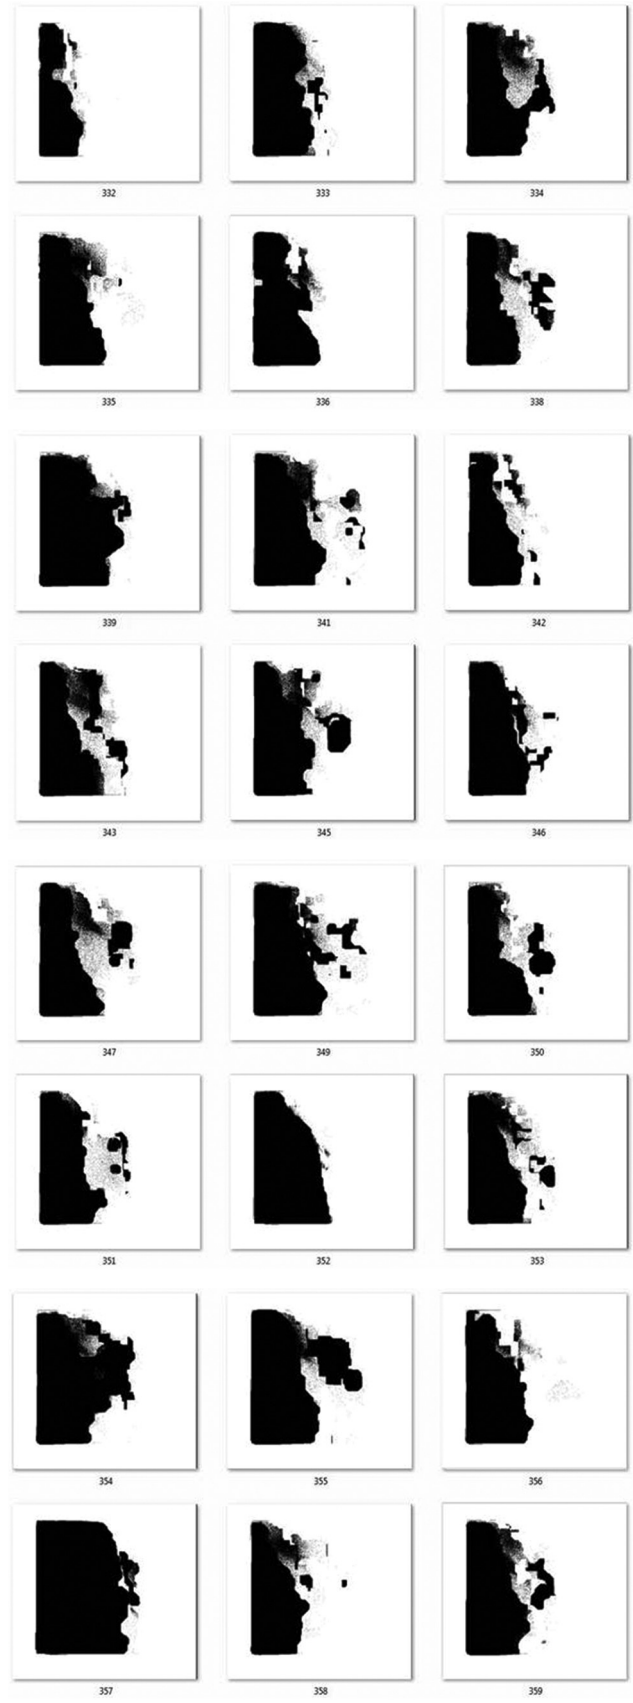

Supplementary Figure 2a: Contd...

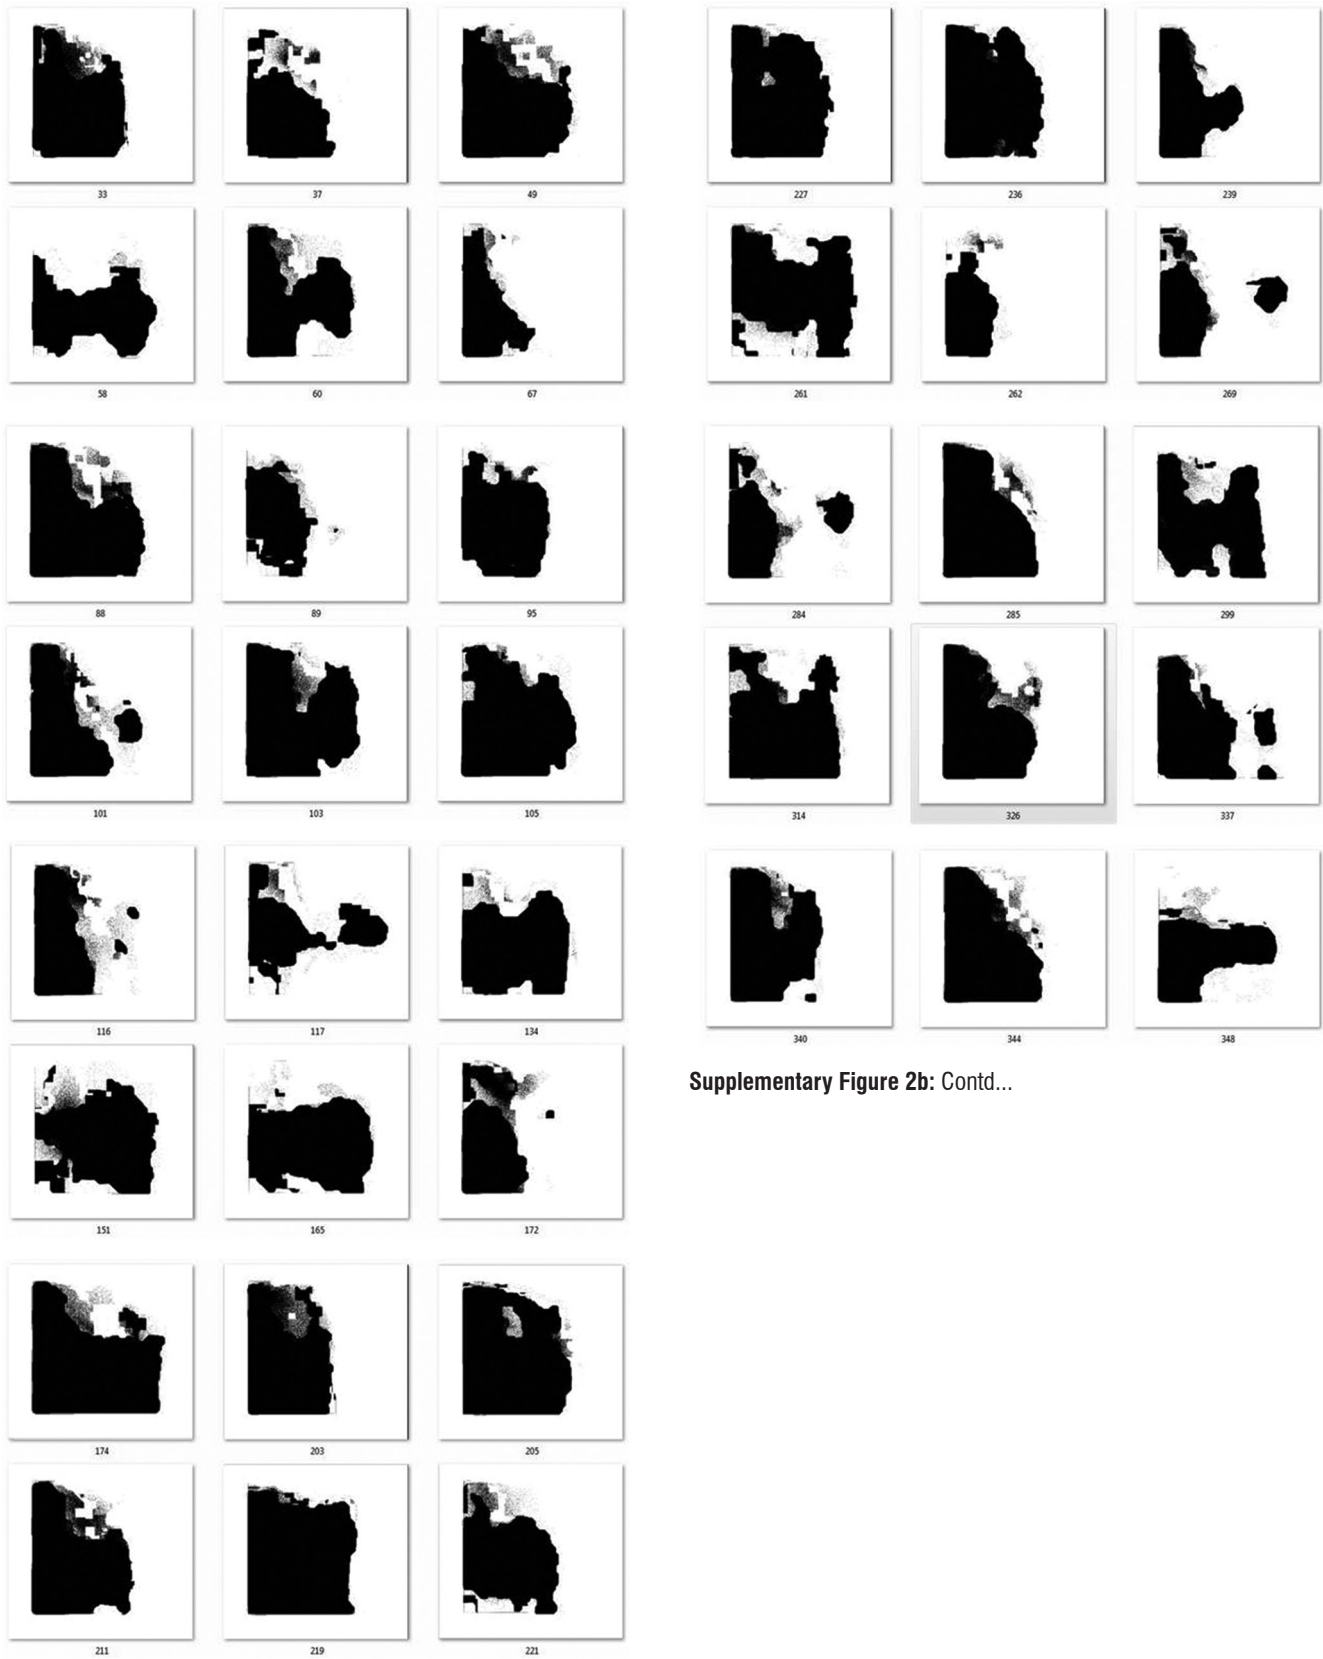

Supplementary Figure 2b: Contd...

**Supplementary Figure 2b:** Result planes obtained by applying mathematical algorithm 025886 to flow cytometry FITS files from acute myeloid leukemia subjects
